# Supplementary material for: Growth of macroporous TiO2on B-doped g-C3N4nanosheets: a Z-scheme photocatalyst for H2O2production and phenol oxidation under visible light
Source: Royal Society of Chemistry journal article supplement (doi:10.1039/d0qi01327g), 2021-01-01
Supplement: d0qi01327g1.pdf [file d0qi01327g1.pdf]

**Supporting Information**

**Growth of Macroporous TiO<sub>2</sub> on B doped g-C<sub>3</sub>N<sub>4</sub> Nanosheet: A Z-Scheme Photocatalyst for H<sub>2</sub>O<sub>2</sub> Production and Phenol Oxidation under Visible Light**

Arjun Behera, Pradeepta Babu, and Kulamani Parida\*

*Centre for Nanoscience and Nanotechnology, Siksha 'O' Anusandhan, Bhubaneswar  
751030, India*

**Table S1:** Literature survey on various TiO<sub>2</sub>/g-C<sub>3</sub>N<sub>4</sub> systems

| Photocatalyst                                                      | Synthesis method                           | Activity                                                                       | Reference    |
|--------------------------------------------------------------------|--------------------------------------------|--------------------------------------------------------------------------------|--------------|
| TiO <sub>2</sub> /C <sub>3</sub> N <sub>4</sub>                    | Hydrothermal                               | H <sub>2</sub> and O <sub>2</sub> generation of 50.2 and 24.3 μmol/h           | 1            |
| TiO <sub>2</sub> /C <sub>3</sub> N <sub>4</sub>                    | Mechanical mixing                          | 57 % N <sub>2</sub> O conversion in 16h                                        | 2            |
| TiO <sub>2</sub> -C <sub>3</sub> N <sub>4</sub>                    | Hydrothermal                               | 94.6 % RhB degradation in 60 min                                               | 3            |
| C/X-TiO <sub>2</sub> @C <sub>3</sub> N <sub>4</sub> (X = N, F, Cl) | Sol-gel-pyrolysis                          | 74.7% p-chlorophenol degradation in 6h                                         | 4            |
| N,S-TiO <sub>2</sub> /g-C <sub>3</sub> N <sub>4</sub>              | Thermal process                            | 125 μmol/h H <sub>2</sub> evolution                                            | 5            |
| TiO <sub>2</sub> /B doped g-C <sub>3</sub> N <sub>4</sub>          | Sonication followed by calcination methods | 87% of 20 ppm phenol in 2h, H <sub>2</sub> O <sub>2</sub> production 22 μmol/h | Present work |

**Table S2:** Crystallite size of different photocatalyst based on Williamson- Hull and Scherer method.

| Photocatalyst    | Crystallite size (D) (nm)<br>W-H analysis | Crystallite size (D) (nm)<br>Scherer analysis |
|------------------|-------------------------------------------|-----------------------------------------------|
| P25              | 28.81                                     | 28.74                                         |
| TiO <sub>2</sub> | 57.27                                     | 59.16                                         |
| E-BCN            | 1.38                                      | 2.1                                           |
| TBCN-4           | 24.31                                     | 23.24                                         |
| TBCN-8           | 69.30                                     | 64.97                                         |
| TBCN-12          | 49.5                                      | 48.41                                         |

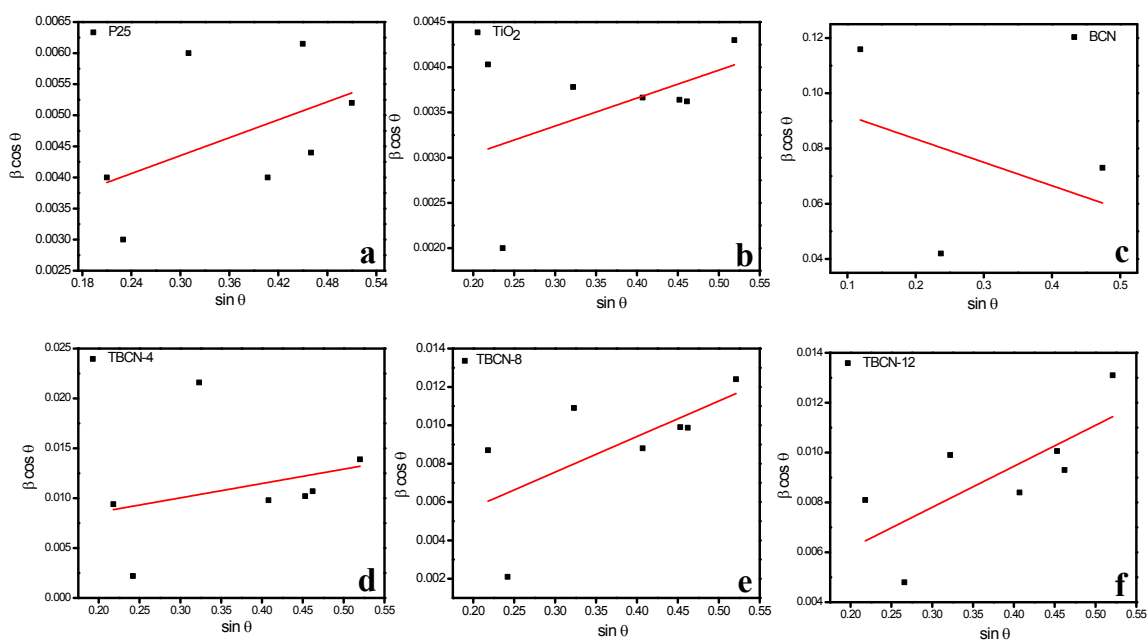

**Figure S1:** W-H plot of different photocatalyst.

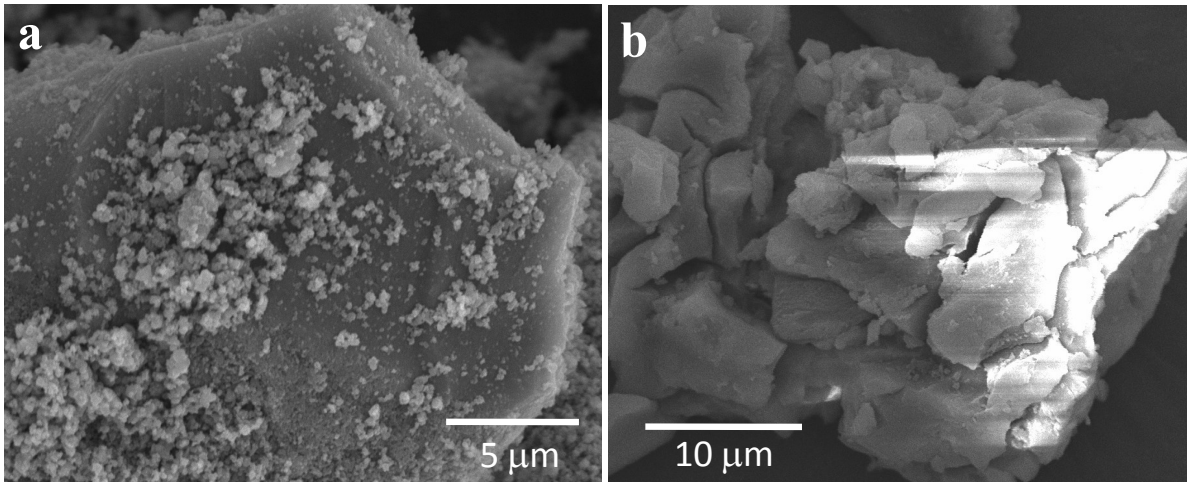

**Figure S2:** SEM images of neat TiO<sub>2</sub> and BCN.

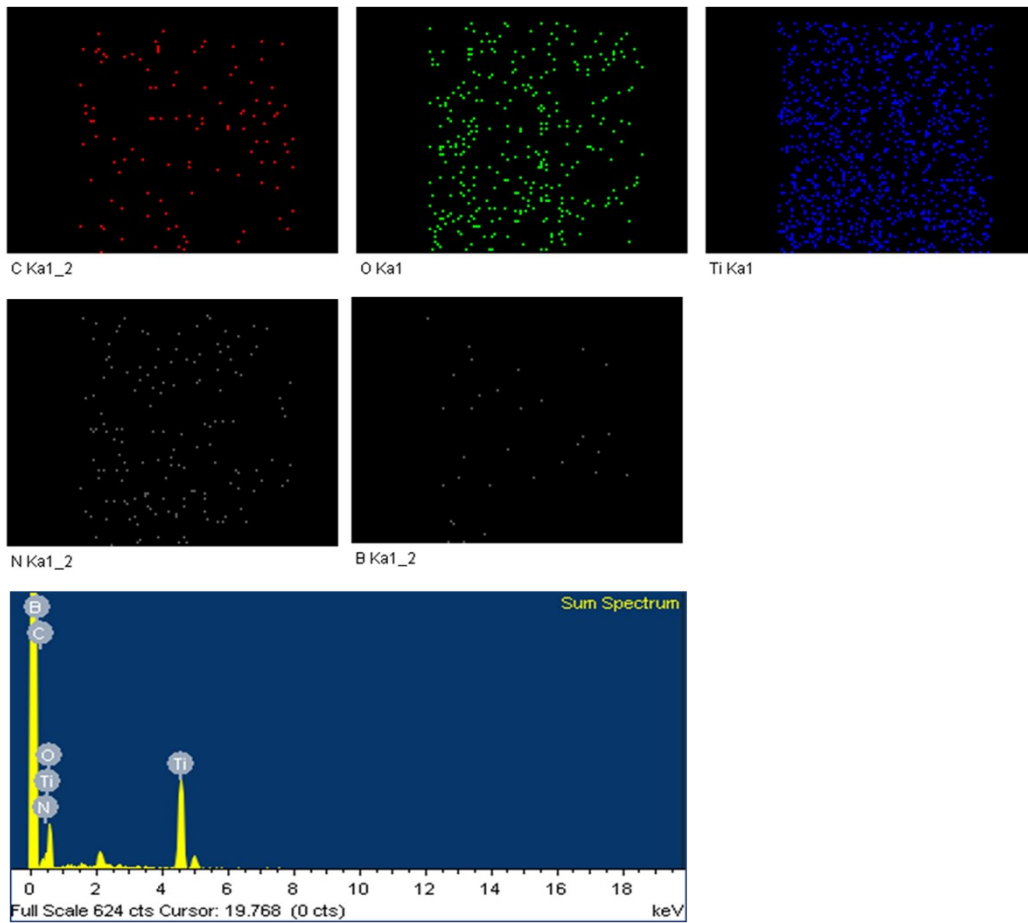

**Figure S3:** Elemental mapping and EDX spectra of TBCN nanocomposites.

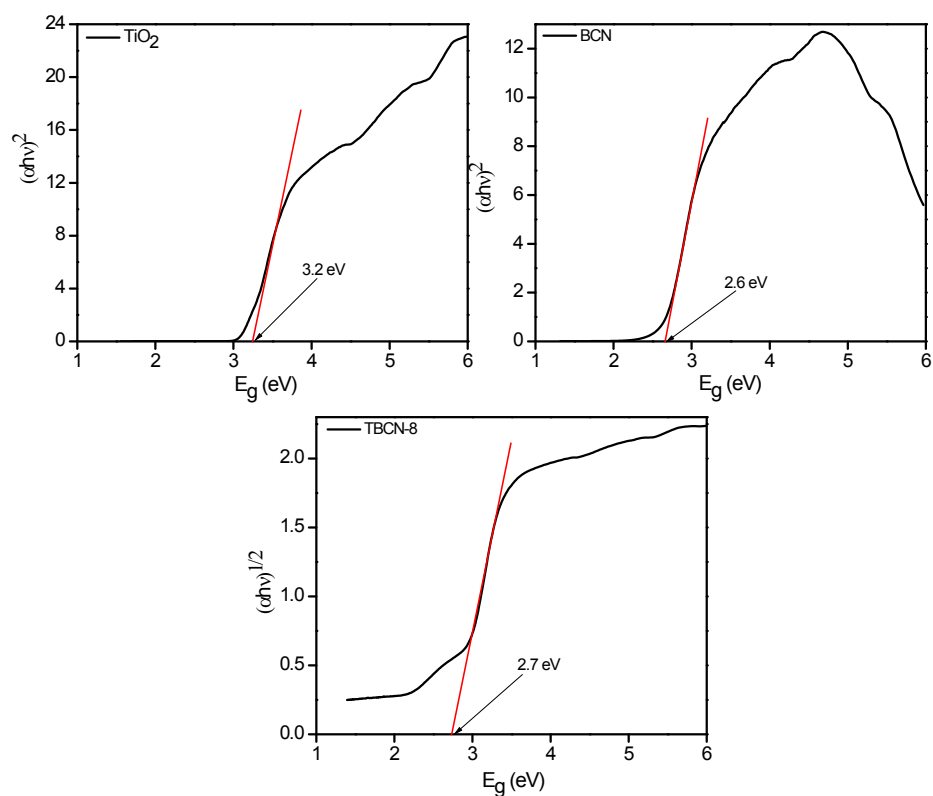

**Figure S4:** (a, b) Direct band gap plot of BCN and pure  $\text{TiO}_2$  (c) Indirect band gap plot of TBCN-8 nanocomposites.

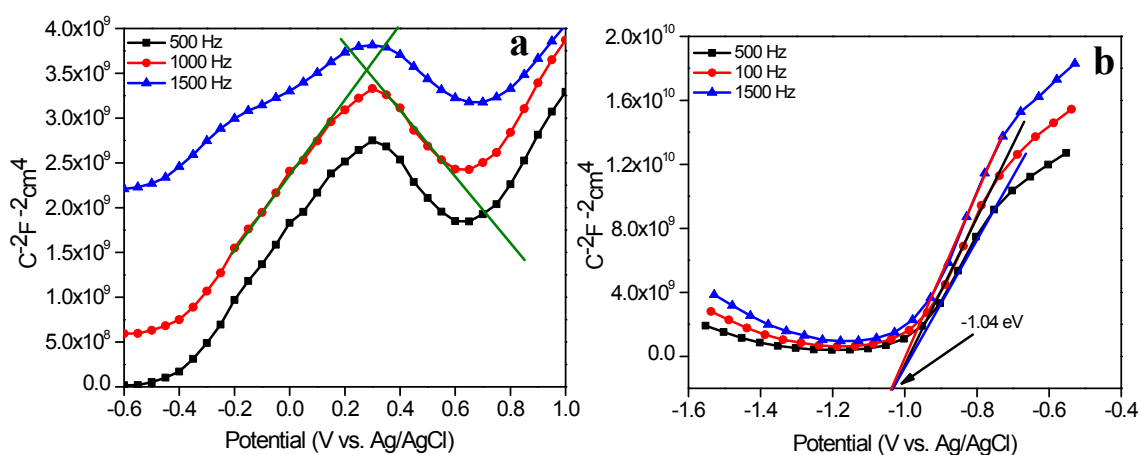

**Figure S5:** (a) Mott-Schottky plot of TBCN-8 composites (b) MS plot of  $\text{TiO}_2$  with different frequencies (500, 1000 and 1500 Hz).

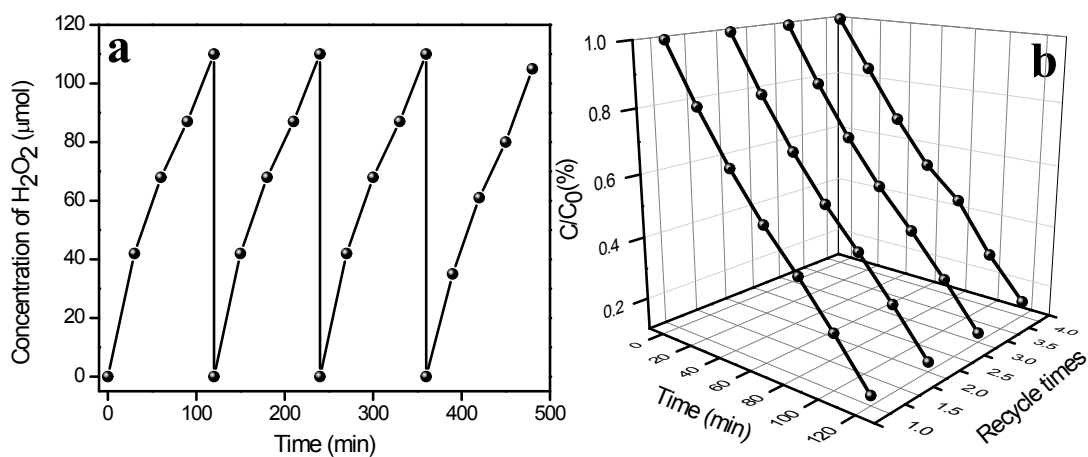

**Figure S6:** (a) Stability plot of H<sub>2</sub>O<sub>2</sub> concentration for consecutive four cycle (b) Reusability plot of phenol oxidation up to 4 cycles.

**Table S3:** 1<sup>st</sup> order kinetics results of phenol over as synthesized photocatalyst.

| Catalysts        | R <sup>2</sup> | k <sub>obs</sub> (min <sup>-1</sup> ) | t <sub>1/2</sub> (min) | % of phenol oxidation |
|------------------|----------------|---------------------------------------|------------------------|-----------------------|
| TiO <sub>2</sub> | 0.86           | 7.4*10 <sup>-3</sup>                  | 93.6                   | 62                    |
| BCN              | 0.93           | 8.4*10 <sup>-3</sup>                  | 82.5                   | 65                    |
| TBCN-4           | 0.94           | 9.4*10 <sup>-3</sup>                  | 73.7                   | 70                    |
| TBCN-8           | 0.92           | 15.7*10 <sup>-3</sup>                 | 44.1                   | 87                    |
| TBCN-12          | 0.95           | 10.9*10 <sup>-3</sup>                 | 63.5                   | 75                    |

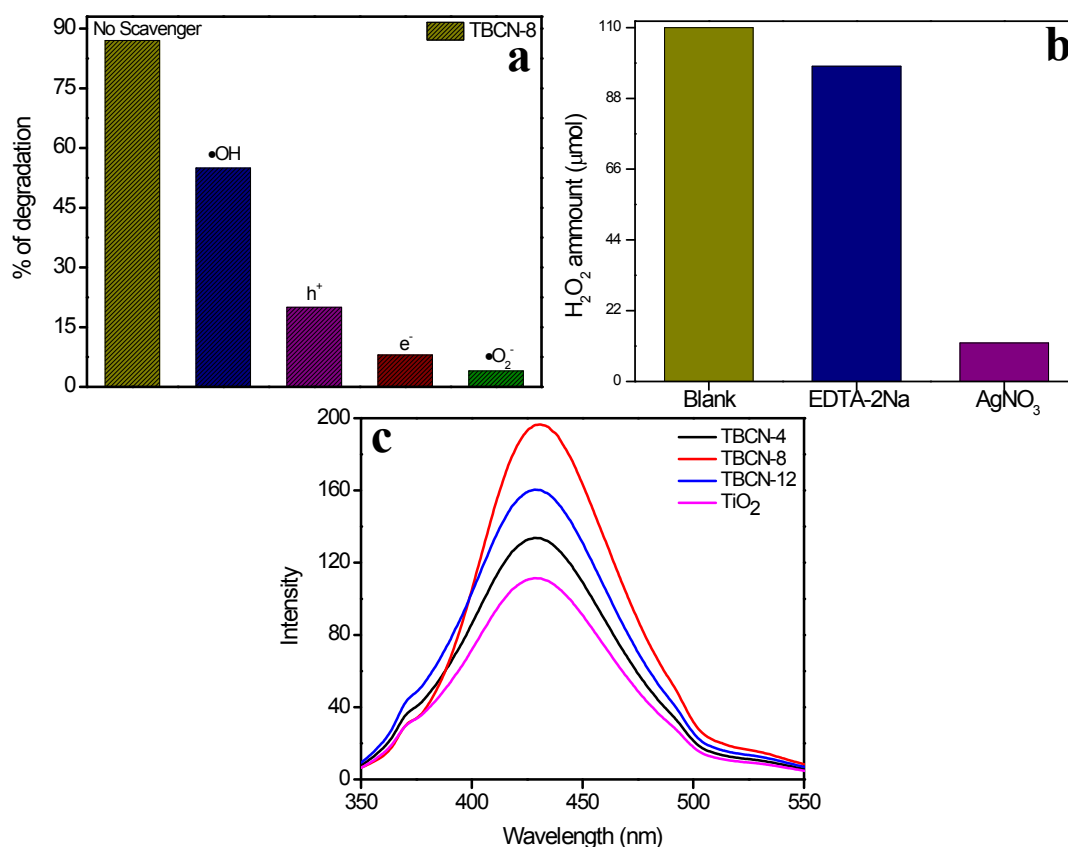

**Figure S7:** (a) Rate of phenol oxidation in the presence of different active species, which is responsible for photocatalytic degradation, processes (b) Scavenger test for photocatalytic H<sub>2</sub>O<sub>2</sub> generation (c) Terephthalic acid tests for the generation of •OH radicals.

### Reference

- (1) J. Yan, H. Wu, H. Chen, Y. Zhang, F. Zhang, S. F. Liu, Fabrication of TiO<sub>2</sub>/C<sub>3</sub>N<sub>4</sub> heterostructure for enhanced photocatalytic Z-scheme overall water splitting. *Appl. Catal. B: Environ.*, 2016, **191**, 130-137.
- (2) M. Reli, P. Huo, M. Šihor, N. Ambrozova, I. Troppová, L. Matejova, P. Praus, Novel TiO<sub>2</sub>/C<sub>3</sub>N<sub>4</sub> photocatalysts for photocatalytic reduction of CO<sub>2</sub> and for photocatalytic decomposition of N<sub>2</sub>O. *J Phys Chem A*, 2016, **120**, 8564-8573.
- (3) W. Wang, Y. Liu, J. Qu, Y. Chen, M. O. Tadé, Z. Shao, Synthesis of hierarchical TiO<sub>2</sub>-C<sub>3</sub>N<sub>4</sub> hybrid microspheres with enhanced photocatalytic and photovoltaic activities by maximizing the synergistic effect. *ChemPhotoChem*, 2017, **1**, 35-45.
- (4) K. Li, Z. Zeng, L. Yan, M. Huo, Y. Guo, S. Luo, X. Luo, Fabrication of C/X-TiO<sub>2</sub>@C<sub>3</sub>N<sub>4</sub> NTs (X= N, F, Cl) composites by using phenolic organic pollutants as raw materials

and their visible-light photocatalytic performance in different photocatalytic systems. *Appl. Catal. B: Environ.*, 2016, **187**, 269-280.

(5) S. Pany, K. M. Parida, A facile in situ approach to fabricate N, S-TiO<sub>2</sub>/g-C<sub>3</sub>N<sub>4</sub> nanocomposite with excellent activity for visible light induced water splitting for hydrogen evolution. *Phys. Chem. Chem. Phys.*, 2015, **17**, 8070-8077.
